# Supplementary material for: Halogenation of graphene triggered by heteroatom doping
Source: Royal Society of Chemistry journal article supplement (doi:10.1039/c9ra06962c), 2019-01-01
Supplement: c9ra06962c1.pdf [file c9ra06962c1.pdf]

## Supplementary Information

### Halogenation of graphene triggered by heteroatom doping

*Samson O. Olanrele<sup>a,b,c</sup> Zan Lian,<sup>a,b</sup> Chaowe Si<sup>a,b</sup> and Bo Li<sup>\*a</sup>*

*<sup>a</sup>Shenyang National Laboratory for Materials Science, Institute of Metal Research, Chinese Academy of Sciences, 72 Wenhua Road, Shenyang 110016, China*

*<sup>b</sup>School of Materials Science and Engineering, University of Science and Technology of China, Shenyang 110016, China*

*<sup>c</sup>Chemical Sciences Department, Mountain Top University, Km 12 Lagos-Ibadan Expressway, Ogun State, Nigeria*

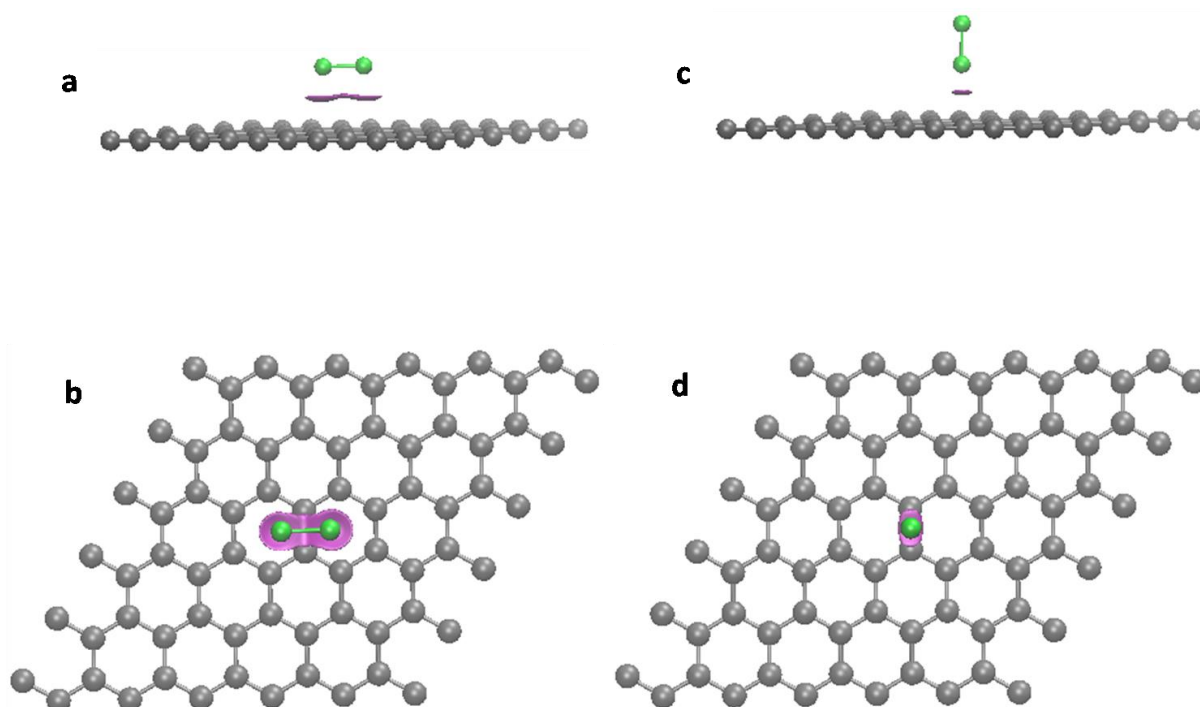

**Figure S1.** Non-covalent bonding analysis plot (a) Side view of the interacted halogen-graphene system at adsorption site A. (b) Front view of the interacted halogen-graphene system at adsorption site A. (c) Side view of the interacted halogen-graphene system at adsorption site I. (d) Front view of the interacted halogen-graphene system at adsorption site I. Gray sphere, green sphere and purple membrane-like sheet represent carbon atoms, halogen atoms and intermolecular bonding force between halogen and pristine graphene respectively.

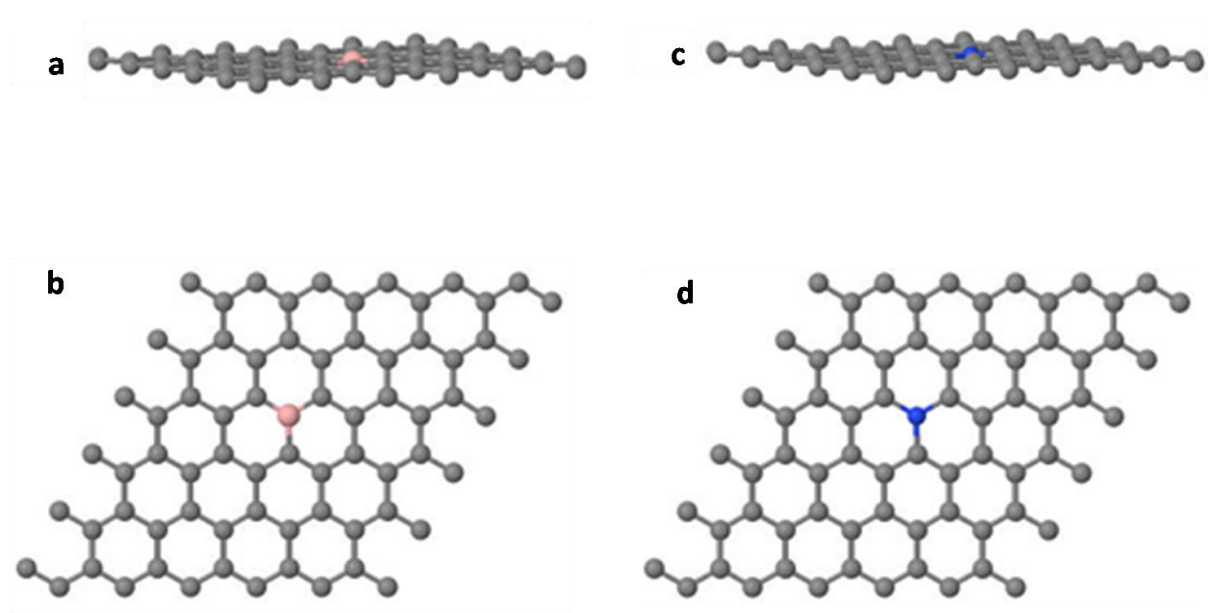

**Figure S2.** Optimized structure of doped-graphene system. **(a)** Side view of the boron-doped graphene system. **(b)** Front view of the boron-doped graphene system **(c)** Side view of the nitrogen doped graphene system. **(d)** Front view of the nitrogen-doped graphene system. Gray, pink and blue spheres represent carbon, boron and nitrogen atoms respectively.

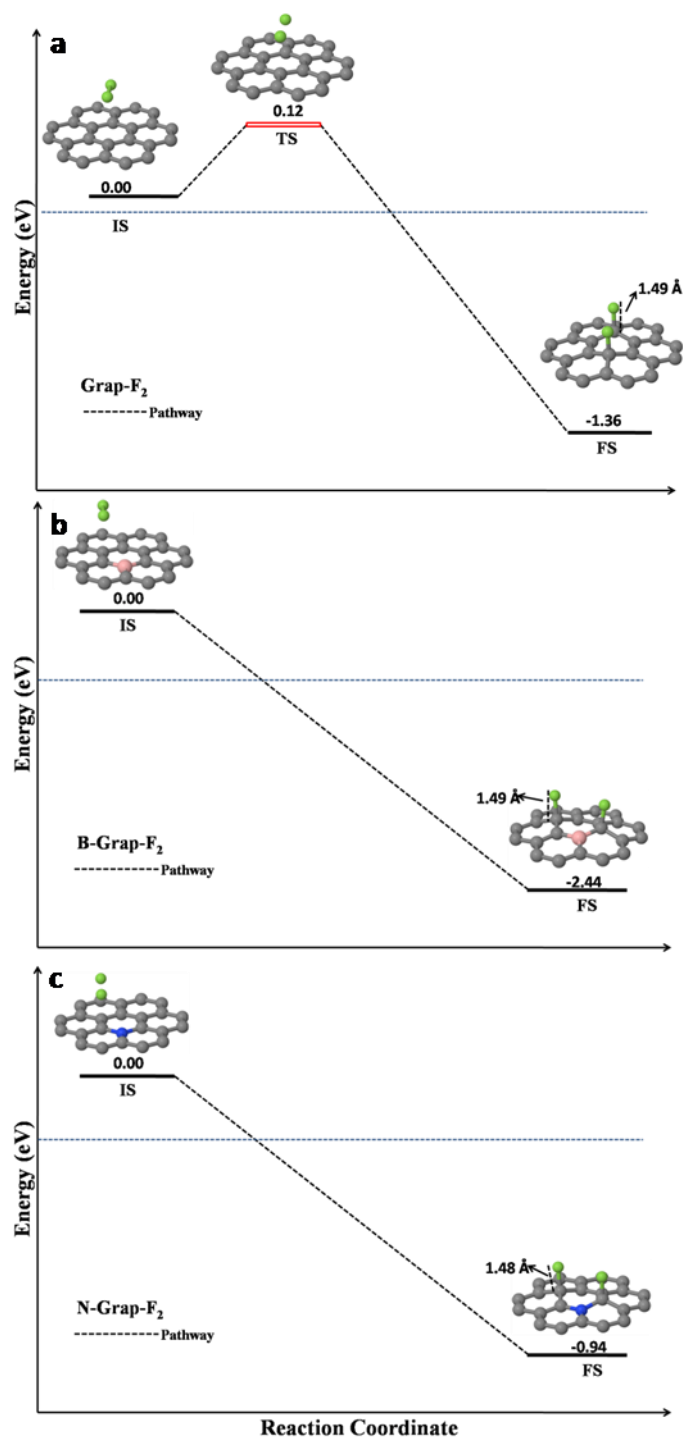

**Figure S3.** Reaction pathways of  $F_2$  on (a) pristine graphene (b) B-doped graphene and (c) N doped graphene.

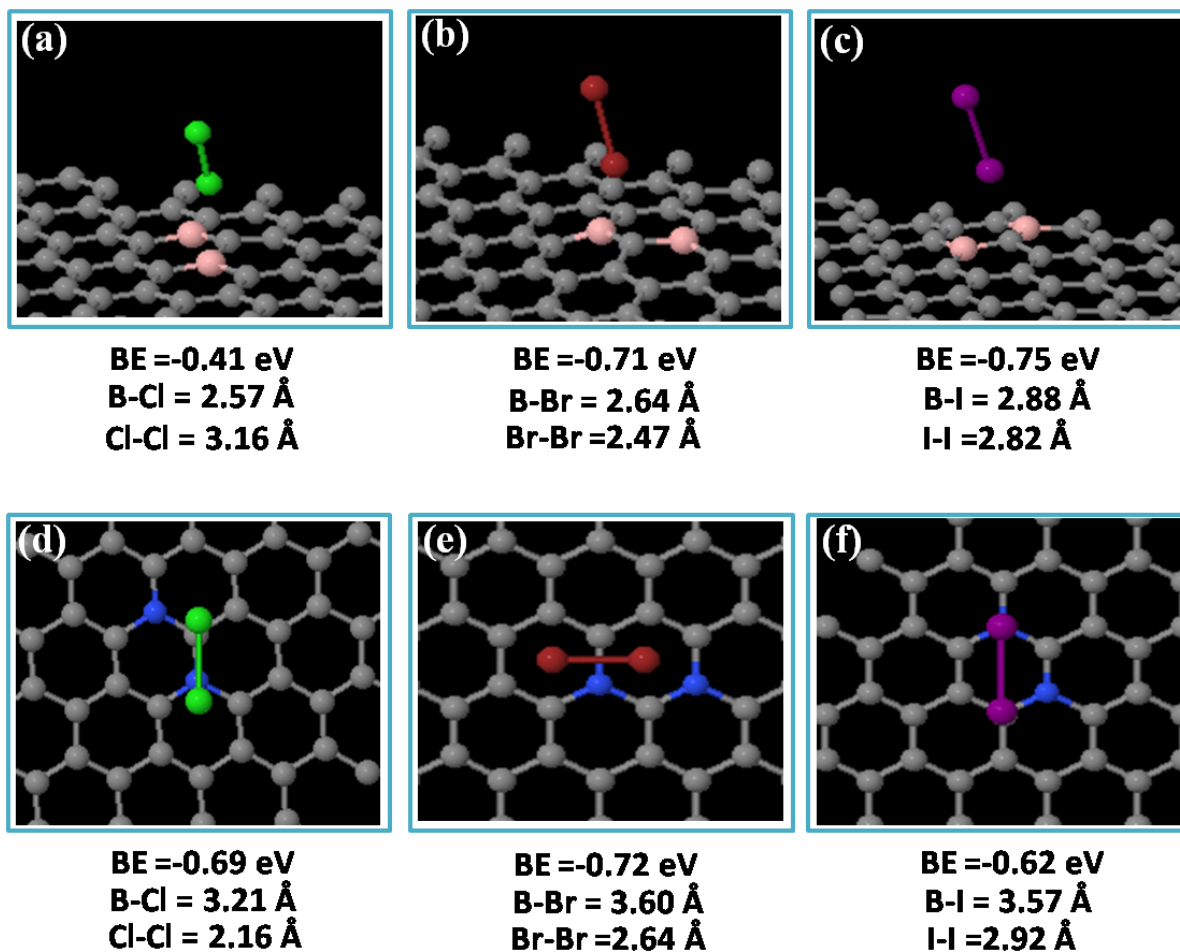

**Figure S4.** Optimized structure of diatomic halogens adsorbed on 2B-doped graphene and 2N-doped graphene at most stable binding sites. (a) Cl<sub>2</sub> (b) Br<sub>2</sub> (c) I<sub>2</sub> adsorbed on 2B-doped graphene; (d) Cl<sub>2</sub> (e) Br<sub>2</sub> (f) I<sub>2</sub> adsorbed on 2N-doped graphene. Gray, pink, blue, light green, green, brown and purple spheres represent carbon, boron, nitrogen, fluorine, chlorine, bromine and iodine atoms respectively.

**Table S1.** The Charge (Q, e) of adsorbed halogen molecules on pristine and doped graphene.

| <b>Graphene-Halogen System</b>                |         |                 |        |        |        |        |        |                      |        |        |
|-----------------------------------------------|---------|-----------------|--------|--------|--------|--------|--------|----------------------|--------|--------|
|                                               |         | <b>Parallel</b> |        |        |        |        |        | <b>Perpendicular</b> |        |        |
| X <sub>2</sub>                                | Charge  | A               | B      | C      | D      | E      | F      | G                    | H      | I      |
| F <sub>2</sub>                                | Q ( e ) | -0.245          | -0.243 | -0.237 | -0.244 | -0.241 | -0.242 | -0.226               | -0.214 | -0.219 |
| Cl <sub>2</sub>                               | Q ( e ) | -0.110          | -0.116 | -0.116 | -0.108 | -0.112 | -0.109 | -0.073               | -0.011 | -0.073 |
| Br <sub>2</sub>                               | Q ( e ) | -0.102          | -0.106 | -0.109 | -0.110 | -0.130 | -0.113 | -0.072               | -0.086 | -0.089 |
| I <sub>2</sub>                                | Q ( e ) | -0.007          | -0.035 | -0.034 | -0.055 | -0.041 | -0.031 | -0.049               | -0.077 | -0.065 |
| <b>Boron-Doped Graphene-Halogen System</b>    |         |                 |        |        |        |        |        |                      |        |        |
|                                               |         | <b>Parallel</b> |        |        |        |        |        | <b>Perpendicular</b> |        |        |
| X <sub>2</sub>                                | Charge  | A               | B      | C      | D      | E      | F      | G                    | H      | I      |
| F <sub>2</sub>                                | Q ( e ) | -0.161          | -0.163 | -      | -0.163 | -      | -0.159 | -                    | -1.128 | -      |
| Cl <sub>2</sub>                               | Q ( e ) | -0.005          | -0.004 | -0.002 | -0.004 | -0.003 | -0.006 | -0.133               | -0.148 | -0.136 |
| Br <sub>2</sub>                               | Q ( e ) | -0.011          | 0.001  | 0.011  | 0.009  | 0.149  | 0.003  | -0.070               | -0.118 | -0.116 |
| I <sub>2</sub>                                | Q ( e ) | 0.085           | 0.057  | 0.073  | 0.069  | 0.084  | 0.077  | -0.011               | -0.124 | 0.096  |
| <b>Nitrogen-Doped Graphene-Halogen System</b> |         |                 |        |        |        |        |        |                      |        |        |
|                                               |         | <b>Parallel</b> |        |        |        |        |        | <b>Perpendicular</b> |        |        |
| X <sub>2</sub>                                | Charge  | A               | B      | A      | B      | A      | B      | A                    | B      | A      |
| F <sub>2</sub>                                | Q ( e ) | -               | -      | -      | -      | -      | -      | -                    | -      | -      |
| Cl <sub>2</sub>                               | Q ( e ) | -0.464          | -0.497 | -0.498 | -0.505 | -0.494 | -0.490 | -0.352               | -0.352 | -0.333 |
| Br <sub>2</sub>                               | Q ( e ) | -0.262          | -0.260 | -0.257 | -0.258 | -0.292 | -0.261 | -0.196               | -0.204 | -0.205 |
| I <sub>2</sub>                                | Q ( e ) | -0.160          | -0.188 | -0.179 | -0.196 | -0.193 | -0.183 | -0.127               | -0.194 | -0.175 |

**Table S2.** The height of the halogen molecules above the doped/undoped-graphene at various adsorption sites.

| Graphene-Halogen System                |       |          |      |      |      |      |      |               |      |      |
|----------------------------------------|-------|----------|------|------|------|------|------|---------------|------|------|
|                                        |       | Parallel |      |      |      |      |      | Perpendicular |      |      |
| X <sub>2</sub>                         | Units | A        | B    | C    | D    | E    | F    | G             | H    | I    |
| F <sub>2</sub>                         | Å     | 3.08     | 3.01 | 3.04 | 2.98 | 3.05 | 2.98 | 2.91          | 2.44 | 2.58 |
| Cl <sub>2</sub>                        | Å     | 3.61     | 3.48 | 3.49 | 3.71 | 3.55 | 3.46 | 3.41          | 3.00 | 3.08 |
| Br <sub>2</sub>                        | Å     | 3.75     | 3.60 | 3.60 | 3.57 | 3.62 | 3.57 | 3.51          | 3.00 | 3.24 |
| I <sub>2</sub>                         | Å     | 3.98     | 3.80 | 3.75 | 3.76 | 3.82 | 3.75 | 3.54          | 3.13 | 3.22 |
| Boron-Doped Graphene-Halogen System    |       |          |      |      |      |      |      |               |      |      |
|                                        |       | Parallel |      |      |      |      |      | Perpendicular |      |      |
| X <sub>2</sub>                         | Units | A        | B    | C    | D    | E    | F    | G             | H    | I    |
| F <sub>2</sub>                         | Å     | 3.07     | 3.02 | -    | 3.00 | -    | 2.98 | -             | 2.04 | -    |
| Cl <sub>2</sub>                        | Å     | 3.63     | 3.49 | 3.47 | 3.52 | 3.57 | 3.49 | 2.91          | 2.86 | 2.95 |
| Br <sub>2</sub>                        | Å     | 3.77     | 3.63 | 3.62 | 3.62 | 3.41 | 3.61 | 2.92          | 2.92 | 2.97 |
| I <sub>2</sub>                         | Å     | 4.02     | 3.74 | 3.77 | 3.77 | 3.81 | 3.67 | 3.08          | 2.96 | 3.09 |
| Nitrogen-Doped Graphene-Halogen System |       |          |      |      |      |      |      |               |      |      |
|                                        |       | Parallel |      |      |      |      |      | Perpendicular |      |      |
| X <sub>2</sub>                         | Units | A        | B    | A    | B    | A    | B    | A             | B    | A    |
| F <sub>2</sub>                         | Å     | -        | -    | -    | -    | -    | -    | -             | -    | -    |
| Cl <sub>2</sub>                        | Å     | 3.49     | 3.30 | 3.26 | 3.33 | 3.41 | 3.44 | 3.49          | 3.38 | 3.19 |
| Br <sub>2</sub>                        | Å     | 3.66     | 3.47 | 3.44 | 3.40 | 3.46 | 3.46 | 3.76          | 3.56 | 3.50 |
| I <sub>2</sub>                         | Å     | 3.98     | 3.70 | 3.68 | 3.68 | 3.69 | 3.61 | 3.58          | 3.27 | 3.33 |

**Table S3.** The bond distance of the halogen molecules adsorbed on doped and undoped graphene at various adsorption sites.

| <b>Graphene-Halogen System</b>                |       |                 |      |      |      |      |      |                      |      |      |
|-----------------------------------------------|-------|-----------------|------|------|------|------|------|----------------------|------|------|
|                                               |       | <b>Parallel</b> |      |      |      |      |      | <b>Perpendicular</b> |      |      |
| X <sub>2</sub>                                | Units | A               | B    | C    | D    | E    | F    | G                    | H    | I    |
| F <sub>2</sub>                                | Å     | 1.69            | 1.67 | 1.66 | 1.68 | 1.67 | 1.67 | 1.67                 | 1.70 | 1.69 |
| Cl <sub>2</sub>                               | Å     | 2.05            | 2.05 | 2.05 | 2.05 | 2.05 | 2.04 | 2.02                 | 2.02 | 2.02 |
| Br <sub>2</sub>                               | Å     | 2.39            | 2.40 | 2.39 | 2.39 | 2.39 | 2.39 | 2.38                 | 2.31 | 2.37 |
| I <sub>2</sub>                                | Å     | 2.74            | 2.74 | 2.74 | 2.74 | 2.74 | 2.74 | 2.71                 | 2.74 | 2.71 |
| <b>Boron-Doped Graphene-Halogen System</b>    |       |                 |      |      |      |      |      |                      |      |      |
|                                               |       | <b>Parallel</b> |      |      |      |      |      | <b>Perpendicular</b> |      |      |
| X <sub>2</sub>                                | Units | A               | B    | C    | D    | E    | F    | G                    | H    | I    |
| F <sub>2</sub>                                | Å     | 1.66            | 1.64 | -    | 1.65 | -    | 1.65 | -                    | 1.72 | -    |
| Cl <sub>2</sub>                               | Å     | 1.99            | 1.99 | 1.99 | 1.99 | 1.99 | 1.99 | 2.05                 | 2.05 | 2.05 |
| Br <sub>2</sub>                               | Å     | 2.31            | 2.31 | 2.31 | 2.31 | 2.31 | 2.31 | 2.38                 | 2.39 | 2.38 |
| I <sub>2</sub>                                | Å     | 2.68            | 2.68 | 2.69 | 2.69 | 2.69 | 2.68 | 2.75                 | 2.76 | 2.75 |
| <b>Nitrogen-Doped Graphene-Halogen System</b> |       |                 |      |      |      |      |      |                      |      |      |
|                                               |       | <b>Parallel</b> |      |      |      |      |      | <b>Perpendicular</b> |      |      |
| X <sub>2</sub>                                | Units | A               | B    | A    | B    | A    | B    | A                    | B    | A    |
| F <sub>2</sub>                                | Å     | -               | -    | -    | -    | -    | -    | -                    | -    | -    |
| Cl <sub>2</sub>                               | Å     | 2.24            | 2.28 | 2.28 | 2.29 | 2.28 | 2.28 | 2.19                 | 2.18 | 2.16 |
| Br <sub>2</sub>                               | Å     | 2.56            | 2.56 | 2.55 | 2.55 | 2.53 | 2.55 | 2.56                 | 2.56 | 2.54 |
| I <sub>2</sub>                                | Å     | 2.85            | 2.88 | 2.88 | 2.87 | 2.88 | 2.87 | 2.82                 | 2.83 | 2.85 |
